# Supplementary material for: Discovery of the Cryptic Sites of SARS-CoV-2 Papain-like Protease and Analysis of Its Druggability
Source: MDPI journal article supplement (doi:10.3390/ijms231911265), 2022-09-24
Supplement: s1 [file s1]

## Supporting Information

# Discovery of the Cryptic Sites of SARS-CoV-2 Papain-Like Protease and Analysis of Its Druggability

Yue Qiu <sup>†</sup>, Qing Liu <sup>†</sup>, Gao Tu and Xiao-Jun Yao <sup>\*</sup>

Dr. Neher's Biophysics Laboratory for Innovative Drug Discovery, State Key Laboratory of Quality Research in Chinese Medicine, Macau Institute for Applied Research in Medicine and Health, Macau University of Science and Technology, Taipa, Macau, China

<sup>\*</sup> Correspondence: xjyao@must.edu.mo; Tel.: +853-88972438

<sup>†</sup> These authors contributed equally to this work.

## Content

Table S1. Site detection information of sitemap 2

Table S2. Site detection information of Cavity 3

Table S3. Site detection information of DeepSite 4

Figure S1. The contribution of each residue to the pocket boundary in trajectories. 5

Figure S2. The distribution of clusters. 6

Figure S3. Physicochemical properties of the pocket along the MD trajectory of the clustering result. 7

Figure S4. The heatmap for the TRAPP-LR/CNN models for selected specific cluster. 8

Figure S5. Physicochemical properties of the pocket along the MD trajectory of the clustering result. 9

**Table S1. Site detection information of sitemap**

| <b>Entry Name</b>     | <b>SiteScore</b> | <b>size</b> | <b>Dscore</b> | <b>volume</b> | <b>exposure</b> | <b>phobic</b> | <b>philic</b> |
|-----------------------|------------------|-------------|---------------|---------------|-----------------|---------------|---------------|
| 6wuu                  |                  |             |               |               |                 |               |               |
| 6wuu_sitemap_1_site_1 | 0.941            | 91          | 0.956         | 230.496       | 0.639           | 0.442         | 1.027         |
| 6wuu_sitemap_1_site_2 | 0.860            | 63          | 0.818         | 226.037       | 0.596           | 0.449         | 1.095         |
| 6wuu_sitemap_1_site_3 | 0.749            | 49          | 0.734         | 114.219       | 0.680           | 0.541         | 0.884         |
| 6wuu_sitemap_1_site_4 | 0.767            | 45          | 0.725         | 98.784        | 0.536           | 1.080         | 0.989         |
| 6wuu_sitemap_1_site_5 | 0.642            | 32          | 0.519         | 81.634        | 0.595           | 0.023         | 1.214         |
| 7cjm                  |                  |             |               |               |                 |               |               |
| 7cjm_sitemap_1_site_1 | 0.966            | 119         | 0.993         | 242.501       | 0.570           | 0.342         | 1.017         |
| 7cjm_sitemap_1_site_2 | 0.793            | 54          | 0.686         | 170.471       | 0.625           | 0.151         | 1.264         |
| 7cjm_sitemap_1_site_3 | 0.768            | 39          | 0.794         | 71.001        | 0.661           | 1.549         | 0.465         |
| 7cjm_sitemap_1_site_4 | 0.598            | 26          | 0.477         | 100.499       | 0.766           | 0.092         | 1.172         |
| 7cjm_sitemap_1_site_5 | 0.579            | 27          | 0.509         | 60.711        | 0.649           | 0.616         | 1.024         |
| 7mly                  |                  |             |               |               |                 |               |               |
| 7mly_sitemap_1_site_1 | 0.650            | 35          | 0.599         | 104.272       | 0.715           | 0.213         | 0.986         |
| 7mly_sitemap_1_site_2 | 0.745            | 36          | 0.517         | 151.949       | 0.550           | 0.015         | 1.535         |
| 7mly_sitemap_1_site_3 | 0.696            | 38          | 0.658         | 128.625       | 0.750           | 0.284         | 0.913         |
| 7mly_sitemap_1_site_4 | 0.667            | 22          | 0.595         | 56.595        | 0.577           | 0.850         | 0.884         |
| 7ofs                  |                  |             |               |               |                 |               |               |
| 7ofs_sitemap_1_site_1 | 1.154            | 87          | 1.240         | 131.369       | 0.356           | 3.081         | 0.378         |
| 7ofs_sitemap_1_site_2 | 0.929            | 75          | 0.925         | 206.143       | 0.559           | 0.501         | 0.992         |
| 7ofs_sitemap_1_site_3 | 0.885            | 71          | 0.730         | 142.345       | 0.486           | 0.107         | 1.478         |
| 7ofs_sitemap_1_site_4 | 0.701            | 42          | 0.675         | 129.654       | 0.734           | 0.341         | 0.892         |
| 7ofs_sitemap_1_site_5 | 0.656            | 38          | 0.624         | 114.219       | 0.752           | 0.209         | 0.900         |
| 7d47                  |                  |             |               |               |                 |               |               |
| 7d47_sitemap_1_site_1 | 0.779            | 60          | 0.759         | 166.698       | 0.726           | 0.205         | 1.027         |
| 7d47_sitemap_1_site_2 | 0.808            | 57          | 0.667         | 146.804       | 0.581           | 0.055         | 1.381         |
| 7d47_sitemap_1_site_3 | 0.780            | 42          | 0.785         | 69.286        | 0.571           | 1.066         | 0.632         |
| 7d47_sitemap_1_site_4 | 0.658            | 35          | 0.589         | 105.987       | 0.650           | 0.137         | 1.065         |
| 7d47_sitemap_1_site_5 | 0.615            | 30          | 0.610         | 39.102        | 0.703           | 0.416         | 0.625         |
| 7d6h                  |                  |             |               |               |                 |               |               |
| 7d6h_sitemap_1_site_1 | 0.819            | 61          | 0.732         | 159.495       | 0.545           | 0.081         | 1.236         |
| 7d6h_sitemap_1_site_2 | 0.895            | 59          | 0.945         | 92.953        | 0.487           | 1.585         | 0.491         |
| 7d6h_sitemap_1_site_3 | 0.678            | 47          | 0.589         | 73.059        | 0.618           | 0.008         | 1.204         |
| 7d6h_sitemap_1_site_4 | 0.672            | 37          | 0.605         | 98.784        | 0.619           | 0.138         | 1.073         |
| 7d6h_sitemap_1_site_5 | 0.786            | 39          | 0.812         | 112.847       | 0.721           | 0.978         | 0.448         |

**Table S2. Site detection information of Cavity**

| <b>Entry Name</b> | <b>RankScore</b> | <b>DrugScore</b> | <b>Hydrophobic</b> | <b>Acceptor</b> | <b>Donor</b> | <b>volume (A^3)</b> |
|-------------------|------------------|------------------|--------------------|-----------------|--------------|---------------------|
| 6wuu              |                  |                  |                    |                 |              |                     |
| vacant1           | 10.447360        | -162             | 121                | 1236            | 1688         | 779.000             |
| vacant2           | 7.7925640        | 35               | 87                 | 834             | 1638         | 774.375             |
| vacant3           | 7.7517430        | -281             | 86                 | 433             | 835          | 458.000             |
| vacant4           | 7.0805280        | -1321            | 15                 | 534             | 797          | 430.375             |
| vacant5           | 6.0967800        | -300             | 167                | 857             | 1023         | 633.125             |
| 7cjm              |                  |                  |                    |                 |              |                     |
| vacant1           | 8.5211300        | -850             | 125                | 1943            | 2211         | 446.625             |
| vacant2           | 8.2056350        | -639             | 433                | 2464            | 3385         | 754.625             |
| vacant3           | 8.0488300        | -1045            | 435                | 1056            | 2082         | 547.375             |
| vacant4           | 7.8262500        | -620             | 668                | 1535            | 2320         | 468.625             |
| vacant5           | 7.2431290        | 409              | 1354               | 2114            | 4357         | 773.500             |
| 7ofs              |                  |                  |                    |                 |              |                     |
| vacant1           | 8.0402660        | -834             | 763                | 1261            | 2138         | 653.000             |
| vacant2           | 7.7967570        | -565             | 673                | 1683            | 2580         | 506.000             |
| vacant3           | 7.0425050        | -735             | 257                | 2145            | 2683         | 517.125             |
| vacant4           | 6.8945670        | -1019            | 234                | 1288            | 2149         | 482.250             |
| vacant5           | 6.8386200        | 609              | 1806               | 2127            | 3671         | 816.125             |
| 7d47              |                  |                  |                    |                 |              |                     |
| vacant1           | 8.8970820        | -704             | 239                | 2666            | 3418         | 710.375             |
| vacant2           | 7.5544520        | -772             | 365                | 1599            | 2734         | 528.250             |
| vacant3           | 7.0460890        | -515             | 722                | 1526            | 2400         | 660.125             |
| vacant4           | 6.7442840        | -840             | 743                | 665             | 1460         | 332.000             |
| vacant5           | 6.5531780        | -226             | 1287               | 1346            | 2476         | 616.125             |
| 7d6h              |                  |                  |                    |                 |              |                     |
| vacant1           | 10.134752        | -179             | 1444               | 1601            | 3263         | 856.000             |
| vacant2           | 7.9764980        | -551             | 791                | 1847            | 3447         | 826.375             |
| vacant3           | 7.8480600        | -645             | 348                | 2645            | 3442         | 744.375             |
| vacant4           | 7.7824750        | -758             | 433                | 1651            | 2887         | 557.625             |
| vacant5           | 7.3167430        | 42               | 1526               | 1993            | 3119         | 776.625             |
| 7mly              |                  |                  |                    |                 |              |                     |
| vacant1           | 9.3610900        | -622             | 262                | 2118            | 2253         | 462.750             |
| vacant2           | 9.3040700        | -133             | 1583               | 1668            | 3303         | 873.125             |
| vacant3           | 8.2173920        | -334             | 860                | 1308            | 2743         | 619.250             |
| vacant4           | 8.2030000        | -489             | 786                | 1724            | 2309         | 502.250             |
| vacant5           | 6.5381150        | -686             | 659                | 1063            | 1505         | 329.625             |

**Table S3. Site detection information of DeepSite**

| <b>Entry Name</b> | <b>scores</b> | <b>x</b> | <b>y</b> | <b>z</b> |
|-------------------|---------------|----------|----------|----------|
| 6wuu              |               |          |          |          |
| 1                 | 0.97285       | 63.56    | 71.26    | 85.41    |
| 2                 | 0.96931       | 85.56    | 47.26    | 63.41    |
| 3                 | 0.98226       | 77.56    | 91.26    | 81.41    |
| 4                 | 0.83317       | 75.56    | 51.26    | 77.41    |
| 5                 | 0.42006       | 85.56    | 65.26    | 83.41    |
| 7cjm              |               |          |          |          |
| 1                 | 0.98817       | 64.99    | 65.67    | 74.43    |
| 2                 | 0.91699       | 78.99    | 91.67    | 82.43    |
| 3                 | 0.88224       | 76.99    | 55.67    | 54.43    |
| 7d6h              |               |          |          |          |
| 1                 | 0.94939       | 63.98    | 67.84    | 73.28    |
| 2                 | 0.94141       | 79.98    | 91.84    | 83.28    |
| 3                 | 0.86360       | 73.98    | 53.84    | 51.28    |
| 4                 | 0.88239       | 87.98    | 77.84    | 81.28    |
| 7d47              |               |          |          |          |
| 1                 | 0.89974       | 63.14    | 67.38    | 74.95    |
| 2                 | 0.84649       | 79.14    | 51.38    | 78.95    |
| 3                 | 0.83823       | 73.14    | 57.38    | 60.95    |
| 4                 | 0.88938       | 81.14    | 93.38    | 82.95    |
| 5                 | 0.63018       | 79.14    | 95.38    | 64.95    |
| 7mly              |               |          |          |          |
| 1                 | 0.94182       | 81.28    | 93.59    | 81.69    |
| 2                 | 0.88745       | 75.28    | 51.59    | 77.69    |
| 3                 | 0.93150       | 63.28    | 67.59    | 73.69    |
| 4                 | 0.76464       | 75.28    | 55.59    | 55.69    |
| 5                 | 0.71294       | 73.28    | 81.59    | 67.69    |
| 7ofs              |               |          |          |          |
| 1                 | 0.99315       | 76.85    | 95.48    | 67.19    |
| 2                 | 0.98623       | 64.85    | 67.48    | 73.19    |
| 3                 | 0.77673       | 72.85    | 51.48    | 77.19    |
| 4                 | 0.83836       | 72.85    | 55.48    | 53.19    |
| 5                 | 0.81327       | 88.85    | 77.48    | 77.19    |
| 6                 | 0.56932       | 66.85    | 73.48    | 89.19    |

**Figure S1. The contribution of each residue to the pocket boundary in trajectories.**

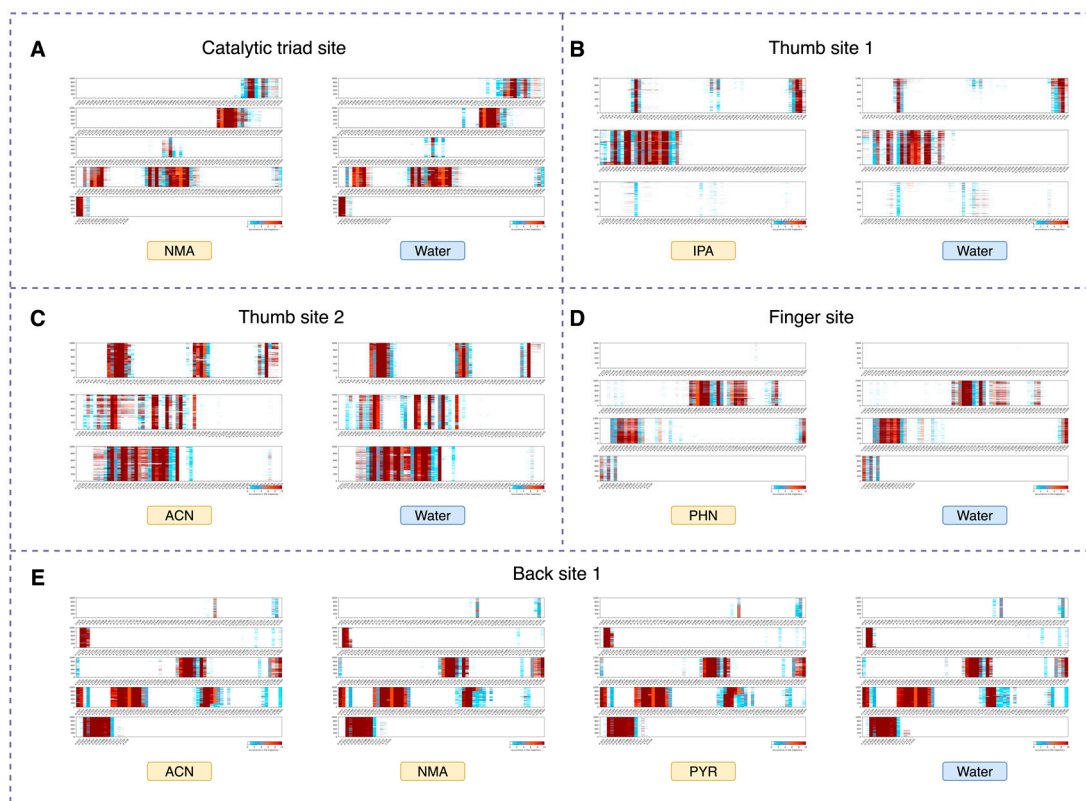

**Figure S1.** The contribution of each residue to the pocket boundary in trajectories. (A) For catalytic triad sites, NMA MixMD system and pure water system. (B) For thumb site 1, IPA MixMD system and pure water system. (C) For Thumb site 2, ACN MixMD system and pure water system. (D) For finger site, PHN MixMD system and pure water system. (E) For back site 1, from left to right, it corresponds to ACN, NMA, PYR MixMD system and pure water system respectively.

**Figure S2. The distribution of clusters.**

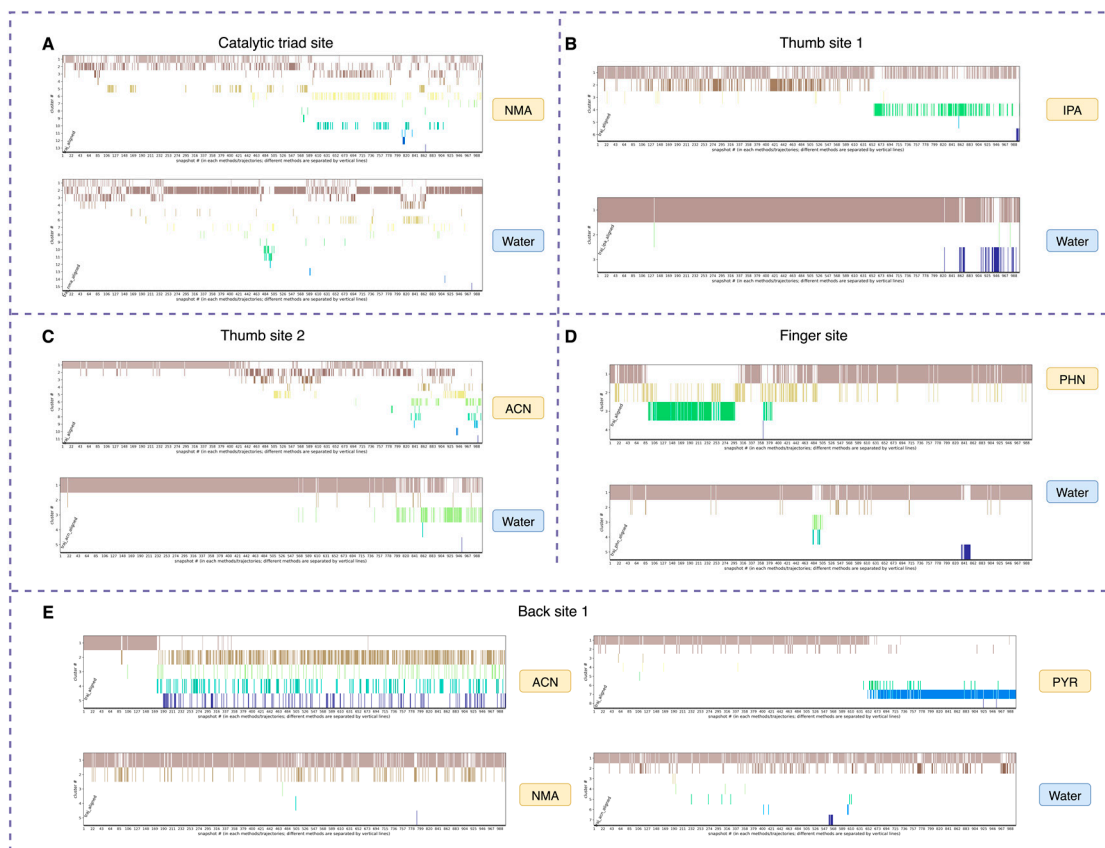

**Figure S2.** The distribution of clusters. (A) For catalytic triad sites, NMA MixMD system and pure water system. (B) For thumb site 1, IPA MixMD system and pure water system. (C) For Thumb site 2, ACN MixMD system and pure water system. (D) For finger site, PHN MixMD system and pure water system. (E) For back site 1, ACN, NMA, PYR MixMD system and pure water system respectively.

**Figure S3. Physicochemical properties of the pocket along the MD trajectory of the clustering result.**

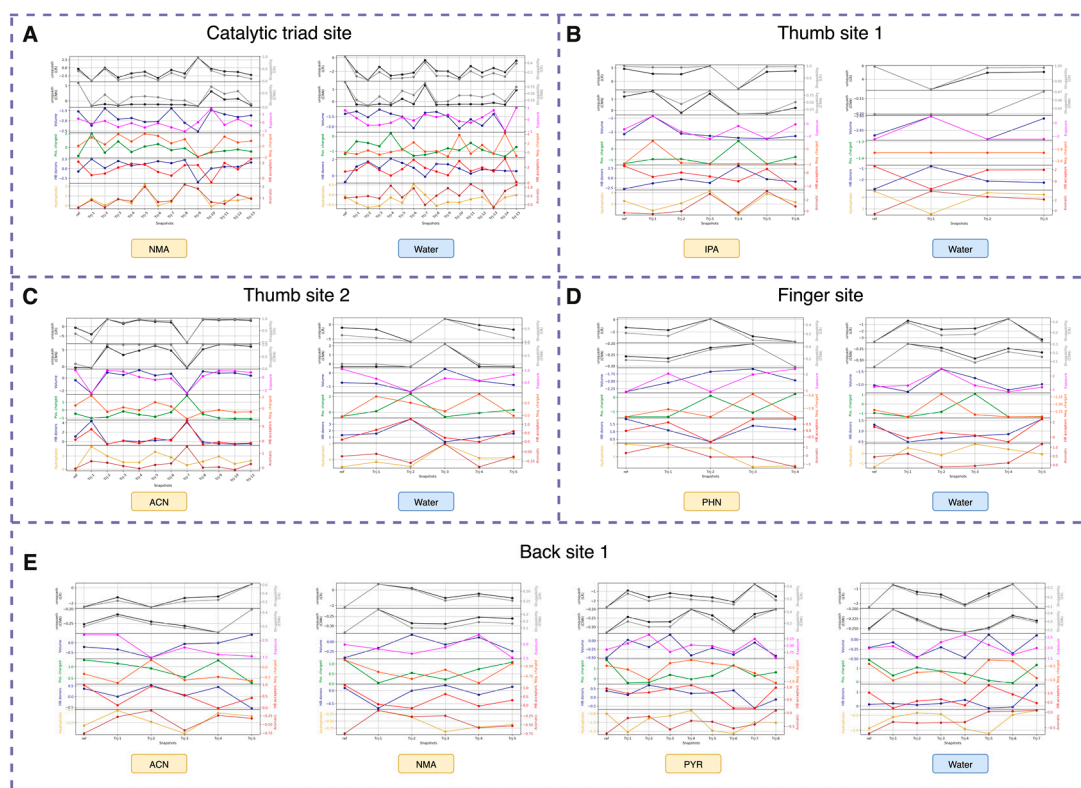

**Figure S3.** Physicochemical properties of the pocket along the MD trajectory of the clustering result. color defines the number of heavy atoms in each residue that contribute to the pocket boundary in a particular snapshot. The darker the color, the closer the residue relates to the pocket. (A) For catalytic triad sites, NMA MixMD system and pure water system. (B) For thumb site 1, IPA MixMD system and pure water system. (C) For Thumb site 2, ACN MixMD system and pure water system. (D) For finger site, PHN MixMD system and pure water system. (E) For back site 1, from left to right, it corresponds to ACN, NMA, PYR MixMD system and pure water system respectively.

**Figure S4. The heatmap for the TRAPP-LR/CNN models for selected specific cluster.**

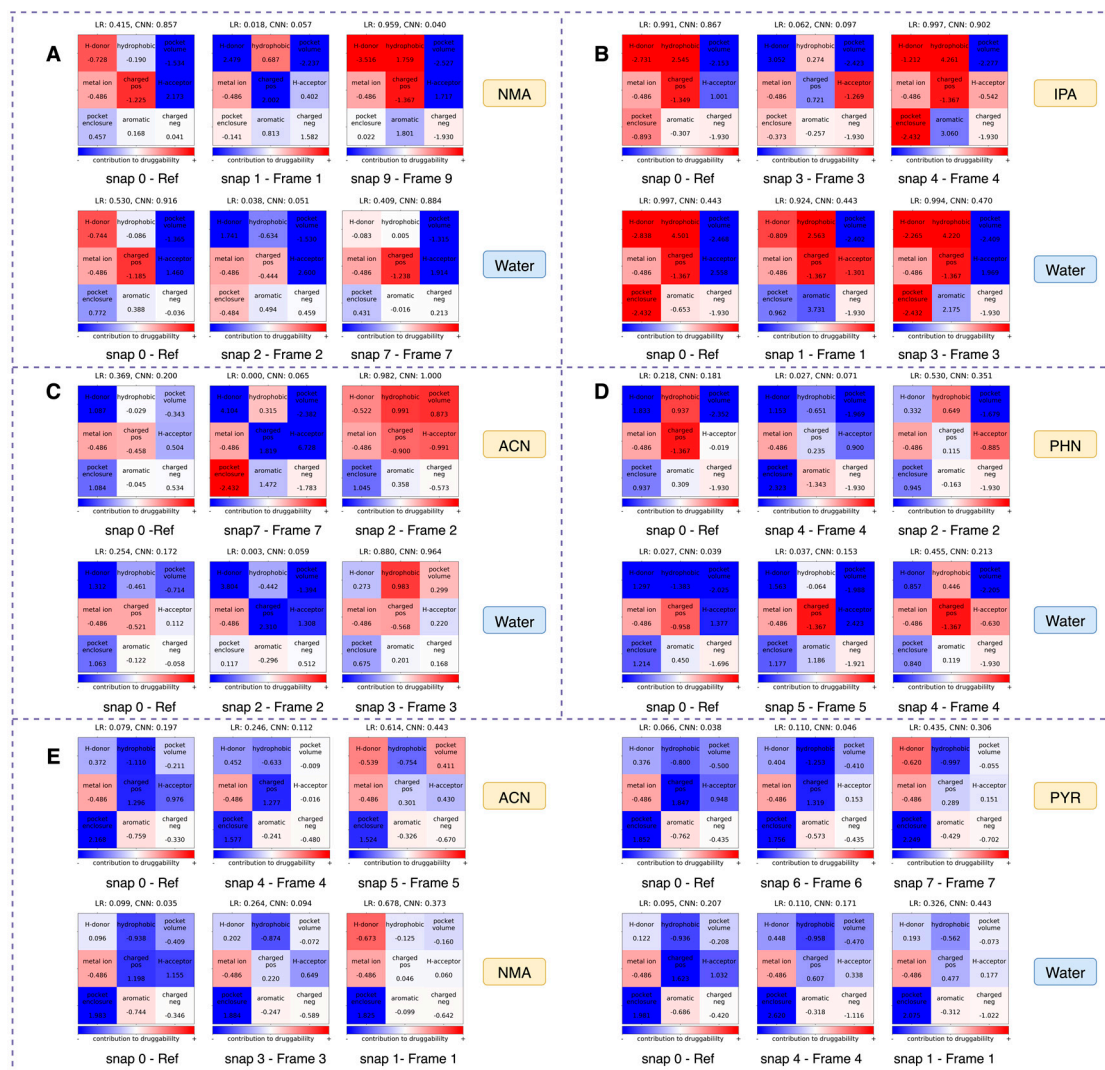

**Figure S4. The heatmap for the TRAPP-LR/CNN models for selected specific cluster.** Each row from left to right corresponds to the reference conformation, the cluster conformation with lowest druggability score and the cluster conformation with relative highest druggability score. (A) For catalytic triad sites, NMA MixMD system and pure water system. (B) For thumb site 1, IPA MixMD system and pure water system. (C) For Thumb site 2, ACN MixMD system and pure water system. (D) For finger site, PHN MixMD system and pure water system. (E) For back site 1, ACN, NMA, PYR MixMD system and pure water system respectively.



**Figure S5. The pocket conformation for specific cluster.**

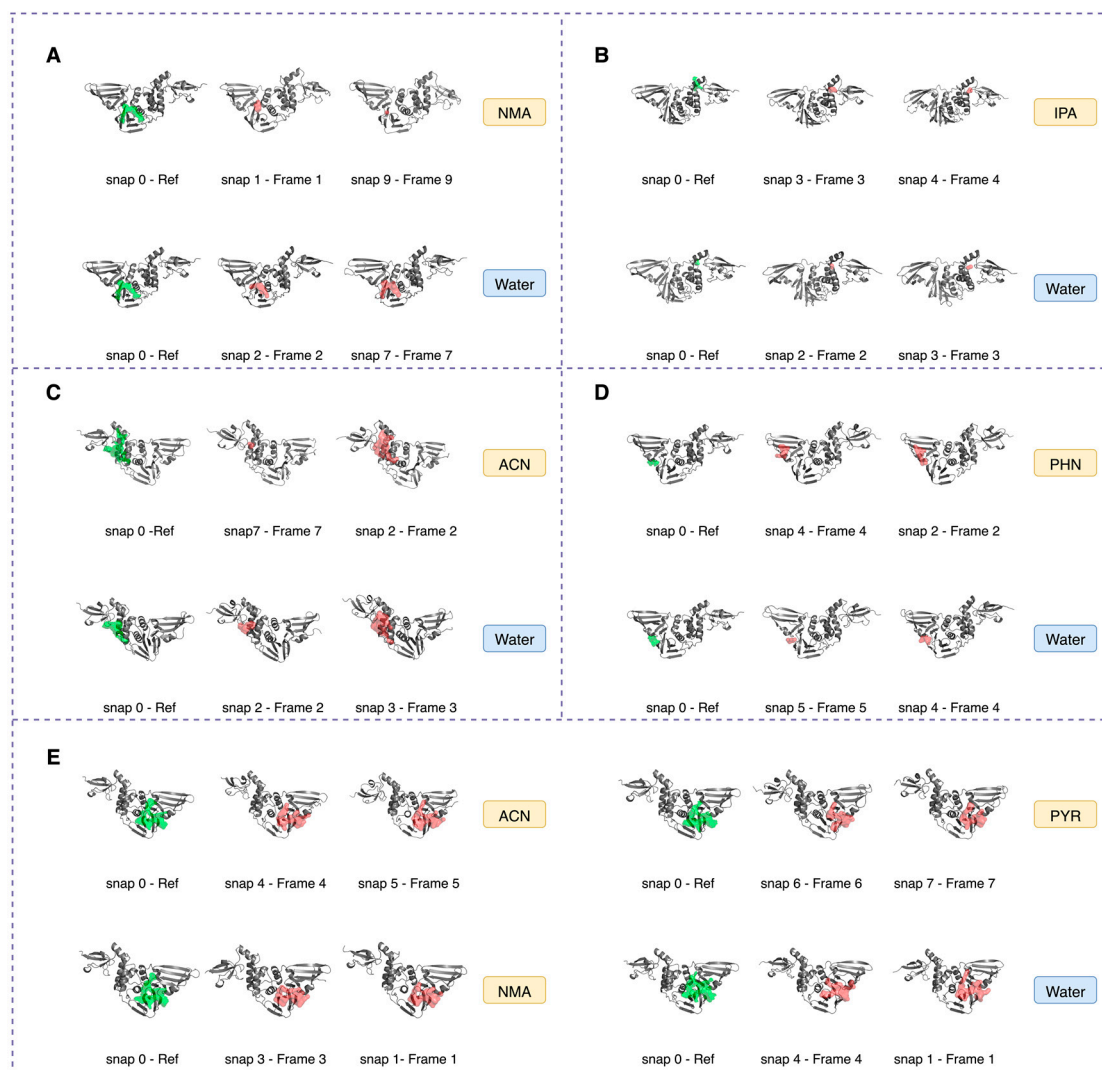

**Figure S5.** The pocket conformation for specific cluster. The pocket distribution is shown in green and red. Each row from left to right corresponds to the reference conformation, the cluster conformation with lowest druggability score and the cluster conformation with relative highest druggability score. (A) For catalytic triad sites, NMA MixMD system and pure water system. (B) For thumb site 1, IPA MixMD system and pure water system. (C) For Thumb site 2, ACN MixMD system and pure water system. (D) For finger site, PHN MixMD system and pure water system. (E) For back site 1, ACN, NMA, PYR MixMD system and pure water system respectively.
